# Supplementary material for: Assessment of the phenotypic diversity and agronomic performance of a Mediterranean lentil collection under rainfed conditions: towards efficient use in breeding programs for adaptation to Mediterranean-type environment
Source: Research Square preprint supplement (doi:10.21203/rs.3.rs-4268289/v2), 2024-06-28
Supplement: Supplementary file 1 [file f8710a7a857f1fac9cc86913.docx]

**Supplemental material**

**Supplemental Table S1 Code, name, biological status, and origin of Mediterranean lentil collection accessions**

| Code | Biological status | Accession name | Origin |
| --- | --- | --- | --- |
| C1 | Improved variety derived from a local landrace | L56 | MOROCCO |
| C2 | Improved variety derived from a local landrace | L24 | MOROCCO |
| C3 | Local cultivar | "Nilou" Gara | MOROCCO |
| C4 | Improved variety | Bakria | MOROCCO |
| C5 | Advanced line | L8PS05-5-13 | ICARDA |
| C6 | Advanced line | ILL8094 | ICARDA |
| G1 | Landrace | ILL171 | TURKEY |
| G10 | Landrace | MGB9315 | MOROCCO |
| G100 | Landrace | MGB1026 | MOROCCO |
| G101 | Landrace | MOUNTAIN LENTIL | ITALY |
| G102 | Landrace | MGB9305 | MOROCCO |
| G103 | Landrace | MGB16593 | MOROCCO |
| G104 | Landrace | MGB1032 | MOROCCO |
| G105 | Landrace | TIPO ASSTELLUCCIO | ITALY |
| G106 | Landrace | MGB7391 | MOROCCO |
| G107 | Landrace | MGB16579 | MOROCCO |
| G108 | Advanced line derived from local landrace | LL580-31 | MOROCCO |
| G109 | Landrace | MGB1051 | MOROCCO |
| G11 | Landrace | MGB1029 | MOROCCO |
| G110 | Advanced line derived from local landrace | LL500-25 | MOROCCO |
| G111 | Landrace | MGB997 | MOROCCO |
| G112 | Landrace | ILL183 | TURKEY |
| G113 | Landrace | MGB1043 | MOROCCO |
| G114 | Landrace | MGB1052 | MOROCCO |
| G12 | Landrace | YERLI1 | TURKEY |
| G13 | Landrace | ILL283 | GREECE |
| G14 | Landrace | MGB1008 | MOROCCO |
| G15 | Landrace | MGB1054 | MOROCCO |
| G16 | Landrace | MGB1058 | MOROCCO |
| G17 | Landrace | MGB7386 | MOROCCO |
| G18 | Landrace | MG110438 | ITALY |
| G19 | Landrace | MGB1061 | MOROCCO |
| G2 | Landrace | MGB996 | MOROCCO |
| G20 | Landrace | MGB999 | MOROCCO |
| G21 | Landrace | MGB1056 | MOROCCO |
| G22 | Landrace | MGB1034 | MOROCCO |
| G23 | Landrace | MG106892 | ITALY |
| G24 | Landrace | ILL295 | GREECE |
| G25 | Landrace | MGB1049 | MOROCCO |
| G26 | Landrace | ILL312 | GREECE |
| G27 | Landrace | MGB1030 | MOROCCO |
| G28 | Landrace | MGB997 | MOROCCO |
| G29 | Landrace | MG111863 | ITALY |
| G3 | Landrace | MGB1010 | MOROCCO |
| G30 | Landrace | MGB1055 | MOROCCO |
| G31 | Landrace | MG110287 | ITALY |
| G32 | Landrace | MG111854 | ITALY |
| G33 | Landrace | MG111849 | ITALY |
| G34 | Landrace | YERLI2 | TURKEY |
| G35 | Landrace | MGB1045 | MOROCCO |
| G36 | Landrace | MGB1027 | MOROCCO |
| G37 | Advanced line | RIL_19 | USDA |
| G38 | Landrace | ILL298 | GREECE |
| G39 | Landrace | MGB1037 | MOROCCO |
| G4 | Landrace | ILL296 | GREECE |
| G40 | Landrace | MGB1030 | MOROCCO |
| G41 | Advanced line | Flip 2003-2L | MOROCCO |
| G42 | Advanced line | Flip 84-112 L | MOROCCO |
| G43 | Advanced line | Flip 93-45 L | MOROCCO |
| G44 | Advanced line | Flip 2006-7L | MOROCCO |
| G45 | Advanced line derived from local landrace | LL599 | MOROCCO |
| G46 | Advanced line derived from local landrace | LL543 | MOROCCO |
| G47 | Advanced line | F04-52 | ICARDA |
| G48 | Advanced line | F05-23 | ICARDA |
| G49 | Advanced line | F05-8 | ICARDA |
| G5 | Advanced line | L905-4-1 | ICARDA |
| G50 | Advanced line | L904-6-15 | ICARDA |
| G51 | Advanced line | L8PS05-4-3 | ICARDA |
| G52 | Advanced line | ILL 6001-81 | ICARDA |
| G53 | Advanced line | ILL81S-15-19 | ICARDA |
| G54 | Advanced line | F00-24 | ICARDA |
| G55 | Advanced line | ILL 8094 | ICARDA |
| G56 | Advanced line | FLIP 95-12L | ICARDA |
| G57 | Advanced line | LC 960254 | ICARDA |
| G58 | Landrace | ZR-18 | MOROCCO |
| G59 | Advanced line | F95-41L | ICARDA |
| G6 | Advanced line | F05-15 | ICARDA |
| G60 | Advanced line | L805-2-7 | ICARDA |
| G61 | Advanced line derived from local landrace | LL580-9 | MOROCCO |
| G62 | Advanced line | L8PS05-5-27 | ICARDA |
| G63 | Advanced line | L8PS05-5-13 | ICARDA |
| G64 | Advanced line | L8PS05-6-4 | ICARDA |
| G65 | Advanced line | L908-4-7 | ICARDA |
| G66 | Advanced line | 010S 96143-4 | ICARDA |
| G67 | Advanced line | 2009S 96518-1 | ICARDA |
| G68 | Advanced line | 08S 41102-030L | ICARDA |
| G69 | Landrace | LR1 | MOROCCO |
| G7 | Landrace | LR2 | MOROCCO |
| G70 | Landrace | LR3 | MOROCCO |
| G71 | Landrace | LR4 | MOROCCO |
| G72 | Landrace | LR5 | MOROCCO |
| G73 | Landrace | LR6 | MOROCCO |
| G74 | Landrace | LR7 | MOROCCO |
| G75 | Landrace | LR8 | MOROCCO |
| G76 | Landrace | LR9 | MOROCCO |
| G77 | Landrace | LR10 | MOROCCO |
| G78 | Landrace | LR11 | MOROCCO |
| G79 | Landrace | ZR-1 | MOROCCO |
| G8 | Landrace | ZR-2 | MOROCCO |
| G80 | Landrace | ZR-3 | MOROCCO |
| G82 | Landrace | ZR-5 | MOROCCO |
| G83 | Landrace | ZR-6 | MOROCCO |
| G84 | Landrace | ZR-7 | MOROCCO |
| G85 | Landrace | ZR-8 | MOROCCO |
| G86 | Landrace | ZR-9 | MOROCCO |
| G87 | Landrace | ZR-10 | MOROCCO |
| G88 | Landrace | ZR-11 | MOROCCO |
| G89 | Landrace | ZR-12 | MOROCCO |
| G9 | Landrace | ZR-13 | MOROCCO |
| G90 | Landrace | ZR-14 | MOROCCO |
| G91 | Landrace | ZR-15 | MOROCCO |
| G92 | Landrace | LN | MOROCCO |
| G93 | Landrace | LN | MOROCCO |
| G94 | Landrace | LN | MOROCCO |
| G95 | Landrace | LN | MOROCCO |
| G96 | Landrace | LN | MOROCCO |
| G97 | Canadian commercial variety | EST | CANADA |
| G98 | Landrace | ZR-17 | MOROCCO |
| G99 | Landrace | ZR-16 | MOROCCO |

**Supplemental Table S2 Physicochemical properties of no-till and conventional tillage fields soil in Sidi El Aidi experimental station**

| Soil properties | pH | Electrical conductivity (dS/m) | NO3  (mg/kg) | P (mg/kg) | K (mg/kg) | Organic matter (%) | Total nitrogen (%) | Total Limestone  (%) | Active Limestone  (%) |
| --- | --- | --- | --- | --- | --- | --- | --- | --- | --- |
| Conventional tillage | 8.30±0.09 | 0.24±0.13 | 30.64±16.56 | 15.69±0.99 | 258.83±25.29 | 2.63±0.09 | 0.11±0.02 | 23.88±1.48 | 11.75±0.24 |
| No-tillage | 8.15±0.06 | 0.33±0.10 | 12.05±1.70 | 18.50±3.55 | 179.75±1.77 | 2.79±0.29 | 0.13±0.01 | 21.82±1.04 | 11.25±0.37 |

**Supplemental Table S3 Physicochemical properties of soil at Adana experimental station**

| **Depth (cm)** | **Clay (%)** | **Sılt (%)** | **Sand (%)** | **pH** | **Salt (Mmhos/cm)** | **Lıme (%)** | **Organic matter (%)** | **P (mg/kg)** | **K (mg/kg)** |
| --- | --- | --- | --- | --- | --- | --- | --- | --- | --- |
| **0-20** | 33.7 | 43.7 | 22.6 | 8.19 | 0.20 | 31.63 | 1.34 | 10.9 | 323 |
| **21-40** | 35.0 | 44.9 | 20.1 | 8.33 | 0.18 | 32.90 | 1.04 | 7.1 | 281 |
| **41-60** | 32.8 | 45.1 | 22.1 | 8.29 | 0.20 | 35.93 | 0.81 | 6.0 | 244 |

**Supplemental Table S4 Effect of tillage system and genotype × tillage interaction on day to 50% flowering (DTF), plant height (PH), hundred-seed weight (HSW) and grain yield (GY) assessed at Sidi El Aidi**

| Source of variance/Trait | DTF | PH | HSW | GY |
| --- | --- | --- | --- | --- |
| Tillage system | 83.64 | 24.4475 | 0.02 | 197146 |
| Genotype × Tillage system | 47.49 | 6.4874 | 0.11** | 83197 |

“**” represents significance at the 0.01 probability level.

**Supplemental Table S5 Effect of the growing season and genotype × growing season interaction on day to 50% flowering (DTF), plant height (PH), hundred-seed weight (HSW) and grain yield (GY) Assessed at Adana**

| Source of variance/Trait | DTF | PH | HSW | GY |
| --- | --- | --- | --- | --- |
| Growing season | 315.82* | 0.607 | 1.03** | 2250860*** |
| Genotype × Growing season | 77.71 | 21.52 | 0.18* | 94860 |

“*”, “**, “***” represent significance at the 0.05, 0.01, and 0.001 probability levels.

**Supplemental Table S6 Analysis of variance (ANOVA) for different traits in the Mediterranean lentil collection grown at Sidi El Aidi during 2021 season (SEA_21), and at Adana during 2021 (Adana_21) and 2022 (Adana_22) seasons**

| Trait | Environment | Block | Genotype | Check | Gen vs. Check | Residuals |
| --- | --- | --- | --- | --- | --- | --- |
|
| DTF | SEA_21 | 452.60** | 253.17** | 810.80** | 228.50** | 34.01 |
| Adana_21 | 261.53** | 72.31** | 83.93** | 71.8** | 12.83 |
| Adana_22 | 994.34** | 296.42 | 982.76** | 262.44 | 173.3 |
| PH | SEA_21 | 7.65* | 6.59** | 8.47* | 6.51** | 2.36 |
| Adana_21 | 6.64 | 19.36** | 68.44** | 17.18** | 6.83 |
| Adana_22 | 60.61 | 25.9 | 72.58 | 23.59 | 29.33 |
| HSW | SEA_21 | 0.12** | 0.24** | 0.48** | 0.23** | 0.03 |
| Adana_21 | 0.27** | 0.42** | 0.55** | 0.41** | 0.04 |
| Adana_22 | 0.61* | 0.25 | 0.38 | 0.25 | 0.16 |
| GY | SEA_21 | 283949.89* | 197344.97** | 807559.53** | 170344.32* | 85032.88 |
| Adana_21 | 318875.19* | 123631.06 | 69271.23 | 126036.36 | 96434.87 |
| Adana_22 | 166597.83* | 70069.11 | 111098.72 | 68037.94 | 50207.64 |

*DTF*, days to 50% flowering (days); *PH*, plant height (cm); *HSW*, hundred-seed weight (g); *GY*, grain yield (kg ha-1). “*”, and “**” represent significance at the 0.05, and 0.01 probability levels, respectively.

**Supplemental Table S7 Mean, range, and heritability recorded for different agronomic traits in the lentil Mediterranean collection grown at Sidi El Aidi during 2021 season (SEA_21), and at Adana during 2021 (Adana_21) and 2022 (Adana_22) seasons**

| **Trait** | **Environment** | **Mean** | **Min** | **Max** | **Heritability (*H*2)** | **Heritability category** |
| --- | --- | --- | --- | --- | --- | --- |
| **DTF** | SEA_21 | 104 | 82 | 142 | 85.70 | High |
| TRK_21 | 87 | 67 | 114 | 83.62 | High |
| TRK_22 | 111 | 61 | 151 | 31.51 | Medium |
| **PH** | SEA_21 | 33.40 | 26.85 | 41.65 | 64.92 | High |
| TRK_21 | 41.65 | 33.87 | 52.7 | 60.77 | High |
| TRK_22 | 43.28 | 26.92 | 55.84 | 0 | - |
| **HSW** | SEA_21 | 3.98 | 2.63 | 5.44 | 87.91 | High |
| TRK_21 | 3.51 | 2.14 | 6.47 | 89.34 | High |
| TRK_22 | 2.76 | 1.56 | 4.31 | 35.87 | Medium |
| **GY** | SEA_21 | 943.85 | 41.59 | 1768.62 | 51.48 | Medium |
| TRK_21 | 1252.35 | 256.61 | 2173.28 | 25.84 | Low |
| TRK_22 | 408.78 | 65.92 | 1207.35 | 31.76 | Medium |

*DTF*, days to 50% flowering (days); *PH*, plant height (cm); *HSW*, hundred-seed weight (g); *GY*, grain yield (kg ha-1).

**Supplemental Table S8 Effect of accessions’ origin on traits assessed in different trials**

| Trait | SEA_21 | Adana_21 | Adana_22 |
| --- | --- | --- | --- |
| Days to 50% flowering (days) | 862.8*** | 524.8*** | 976.7* |
| Plant height (cm) | 15.545 | 41.16 | 71.55 |
| Hundred-seed weight (g) | 1.1834** | 4.404*** | 0.6654 |
| Grain yield (kg ha-1) | 1105620*** | 116755 | 34428 |

*SEA_21*, Sidi El Aidi in 2021 season; *Adana_21*, Adana in 2021 season; *Adana_22*, Adana in 2022 season. Mean squares followed by “*”, “**”, and “***” represent significance difference at the 0.05, 0.01, and 0.001 probability levels, respectively.

**Table S9 Multiple comparisons of different traits based on country of origin**

| SEA_21 | | | | |
| --- | --- | --- | --- | --- |
| Origin | DTF | PH | HSW | GY |
| Morocco | 109a | 32.8a | 3.94a | 888.40a |
| Turkey | 116b | 35.45a | 3.40a | 780.64a |
| Greece | 120b | 31.15a | 4.59b | 374.46b |
| Italy | 126c | 32a | 3.75a | 309.91b |
| Adana_21 | | | | |
| Morocco | 88a | 40.74a | 3.46a | 1224.42a |
| Turkey | 95b | 45.36a | 2.53b | 1020a |
| Greece | 93b | 43.9a | 4.84c | 1031.61a |
| Italy | 102c | 40.42a | 3.29a | 1123.92a |
| Adana_22 | | | | |
| Morocco | 115a | 41.65a | 2.76a | 361.97a |
| Turkey | 129b | 46.58a | 2.25a | 486.91a |
| Greece | 120b | 45.64a | 3.06a | 324.85a |
| Italy | 134c | 45.41a | 2.47a | 291.89a |

*SEA_21*, Sidi El Aidi in 2021 season; *Adana_21*, Adana in 2021 season; *Adana_22*, Adana in 2022 season. *DTF*, days to 50% flowering (days); *PH*, plant height (cm); *HSW*, hundred-seed weight (g); *GY*, grain yield (kg ha-1). Mean values in columns followed by same letters are not significantly different according to Duncan multiple range test (p < 0.05).

**Supplemental Table S10 Variance components estimated for days to 50% flowering (DTF), plant height (PH), hundred-seed weight (HSW) and grain yield (GY) across all environments**

| Variance component/trait | DTF | PH | HSW | GY |
| --- | --- | --- | --- | --- |
| Genotype variance | 113.82*** | 2.14* | 0.18*** | 14750* |
| Environment variance | 149.54*** | 26.78*** | 0.36*** | 223863*** |
| Genotype × Environment variance | 11.09** | 1.01 | 0.00 | 34417*** |
| Heritability (*H*2) | 90.32 | 66.35 | 90.83 | 64.01 |

“**”, and “***” represent significance at the 0.01, and 0.001 probability levels, respectively.

**Supplemental Table S11 Means of traits of four cluster formed from the Mediterranean lentil collection grown at Sidi El Aidi in 2021 (SEA_21), Adana during the 2021 (Adana_21) and 2022 (Adana_22) seasons**

| Cluster | Experiment | DTF | PH | HSW | GY |
| --- | --- | --- | --- | --- | --- |
| Cluster_1 | SEA_21 | 127 | 31.47 | 4.12 | 187.61 |
| Adana_21 | 92 | 39.70 | 3.74 | 760.65 |
| Adana_22 | 107 | 44.55 | 3.12 | 679.09 |
| Cluster_2 | SEA_21 | 112 | 33.52 | 3.84 | 682.29 |
| Adana_21 | 82 | 43.42 | 3.38 | 1779.17 |
| Adana_22 | 109 | 45.16 | 2.66 | 992.56 |
| Cluster_3 | SEA_21 | 102 | 33.16 | 3.91 | 1044.11 |
| Adana_21 | 88 | 40.27 | 3.35 | 1080.75 |
| Adana_22 | 110 | 42.80 | 2.85 | 422.98 |
| Cluster_4 | SEA_21 | 89 | 34.32 | 4.2 | 1459.39 |
| Adana_21 | 86 | 42.70 | 3.52 | 1367.89 |
| Adana_22 | 113 | 43.07 | 2.67 | 115.12 |

*DTF*, days to 50% flowering (days); *PH*, plant height (cm); *HSW*, hundred-seed weight (g); *GY*, grain yield (kg ha-1).
